# Supplementary material for: Manufactured tissue-to-tissue barrier chip for modeling the human blood–brain barrier and regulation of cellular trafficking
Source: Royal Society of Chemistry journal article supplement (doi:10.1039/d3lc00124e), 2023-01-01
Supplement: d3lc00124e1.pdf [file d3lc00124e1.pdf]

**Supporting information**

**Manufactured tissue-to-tissue barrier chip for modeling the human blood-brain barrier  
and regulation of cellular trafficking**

**Jaehoon Kim<sup>1,†</sup>, Taehee Yoon<sup>1,2,†</sup>, Paul Kim<sup>3</sup>, Mandakh Bekhbat<sup>3</sup>, So Mang Kang<sup>4</sup>, Hoon Suk Rho<sup>4</sup>, Song Ih Ahn<sup>5</sup>  
and YongTae Kim<sup>1,2,6,7\*</sup>**

<sup>1</sup> George W. Woodruff School of Mechanical Engineering, Georgia Institute of Technology, Atlanta, GA 30332, USA

<sup>2</sup> Parker H. Petit Institute for Bioengineering and Bioscience, Georgia Institute of Technology, Atlanta, GA 30332, USA

<sup>3</sup> Department of Psychiatry & Behavioral Sciences, School of Medicine, Emory University, Atlanta, GA, 30322

<sup>4</sup> MEPSGEN Co., LTD., Seoul, Republic of Korea

<sup>5</sup> Department of Mechanical Engineering, Pusan National University, Busan, Republic of Korea

<sup>6</sup> Wallace H. Coulter Department of Biomedical Engineering, Georgia Institute of Technology, Atlanta, GA 30332, USA

<sup>7</sup> Institute for Electronics and Nanotechnology, Georgia Institute of Technology, Atlanta, GA 30332, USA

\* Correspondence: [ytkim@gatech.edu](mailto:ytkim@gatech.edu)

<sup>†</sup> These authors contributed equally to this paper.

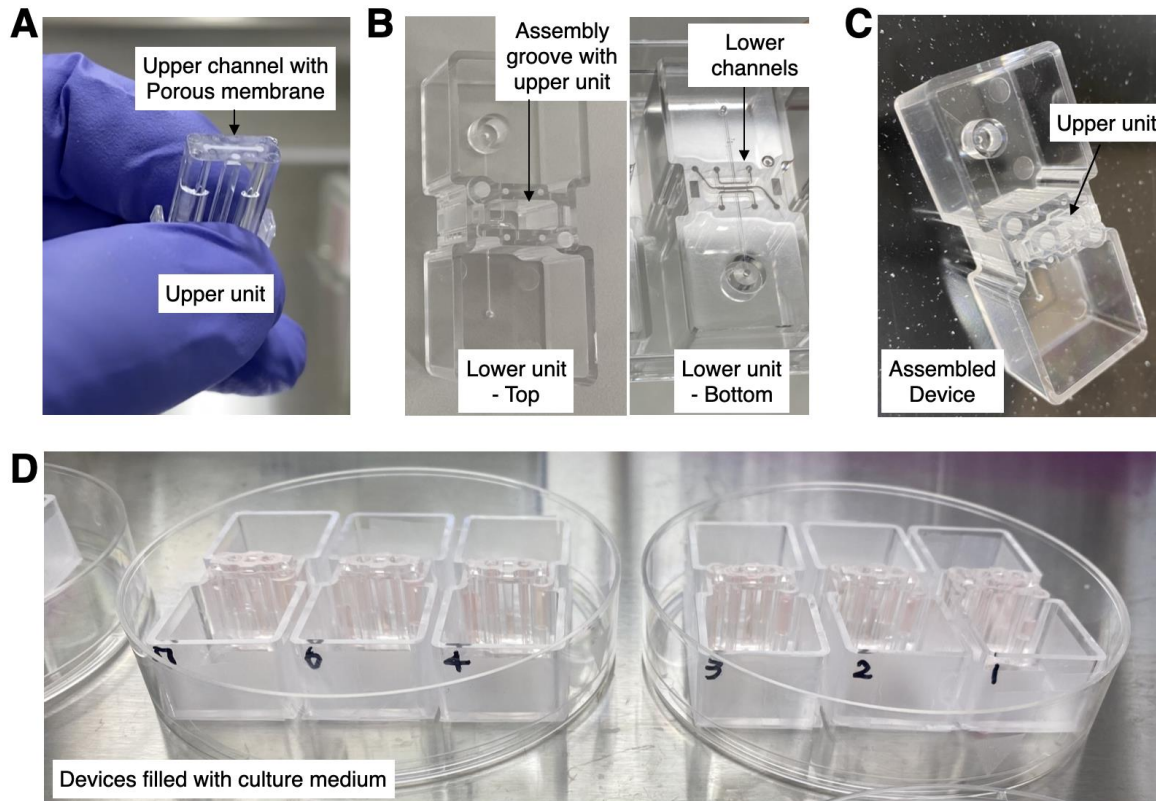

**Figure S1.** Pictures of the micro-engineered physiological system-tissue barrier chip (MEPS-TBC). (A) Upper unit has upper channel with a porous membrane at the bottom. (B) Lower unit has an assembly groove with the upper unit and lower unit has lower channels at the bottom. (C) Assembled device. The upper unit was inserted into the assembly groove and mechanically assembled. (D) Manufactured chips filled with culture medium for in vitro BBB model culture.

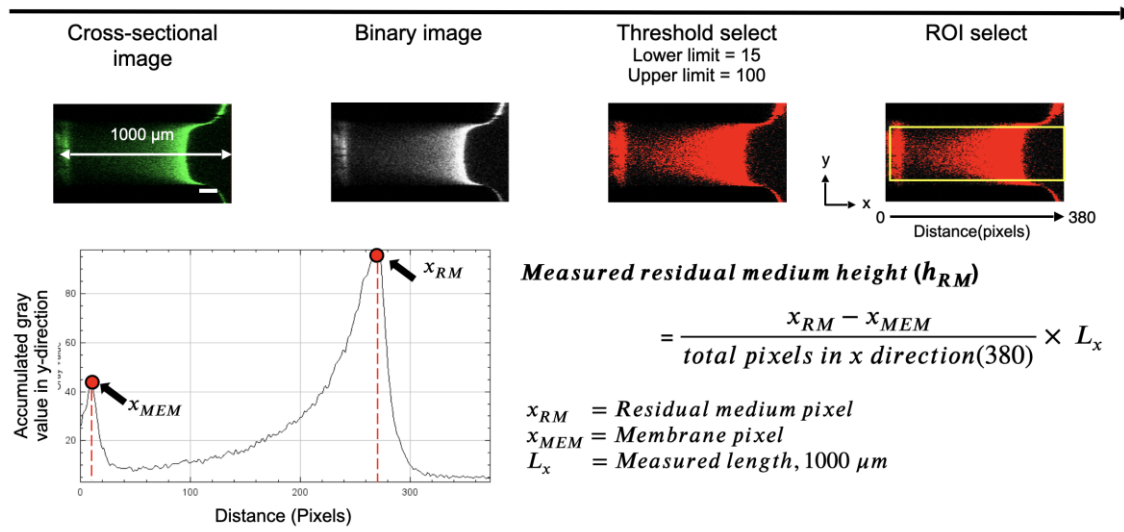

**Figure S2.** Residual medium height ( $h_{RM}$ ) measurement. Cross-sectional images of hydrogel stained with im-

munofluorescence were captured using confocal microscopy. A gel boundary was then confined, and the accu-

mulated gray value in the y direction was measured using the ImageJ tool. The total pixels of the lower channel

in the x direction were measured 380. The highest gray value intensity of gel was set to the porous membrane

and the residual medium region, respectively. (Scale bar = 100  $\mu\text{m}$ )

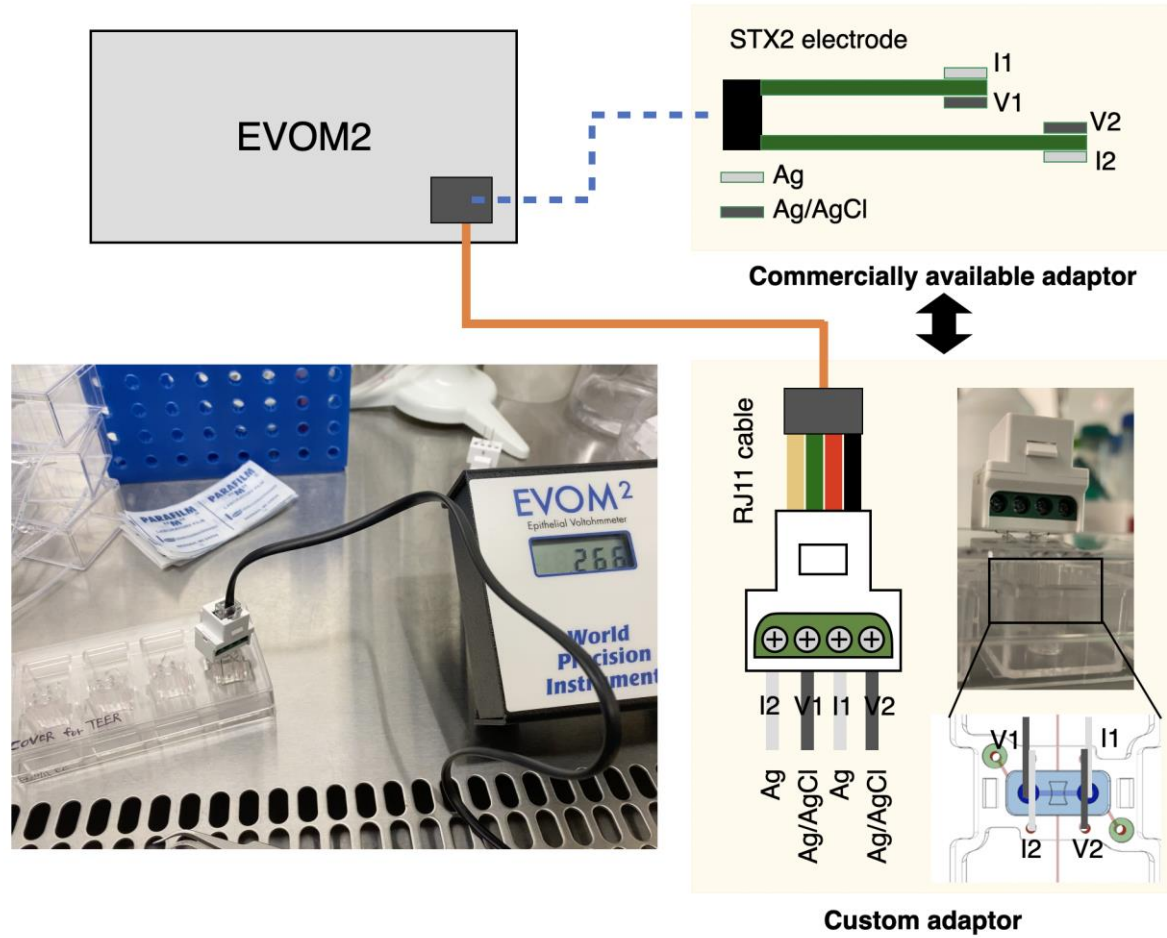

27 **Figure S3.** Trans-endothelial electrical resistance (TEER) measurement in MEPS-TBC. TEER was measured  
 28 using a commercially available volt-ohmmeter (EVOM2) with a custom electrode adaptor made with Rj11 ca-  
 29 ble, RJ11 female connector and Ag, Ag/AgCl electrode wires. Each of the Ag and Ag/AgCl wire is inserted into  
 30 the upper (indicated by blue circles) and the lower side channel (indicated by red circles).

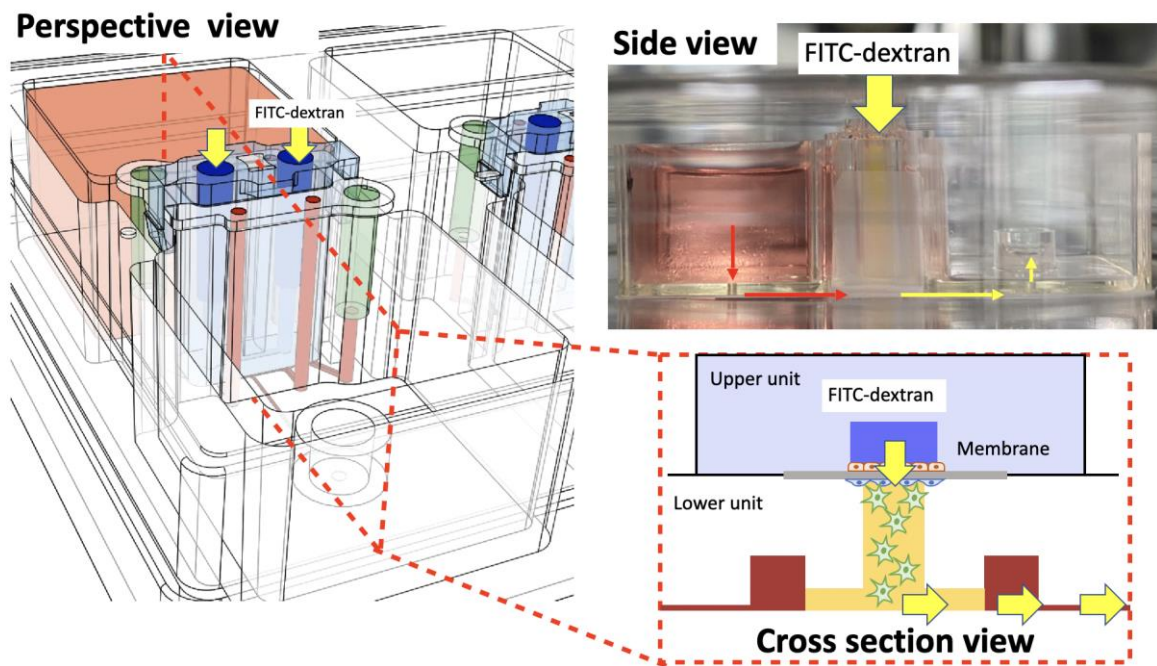

31 **Figure S4.** Permeability measurement in MEPS-TBC. Culture medium containing 500  $\mu\text{g/ml}$  of 4kDa or 40kDa  
 32 FITC-dextran was dosed through the vascular channels for 1h. Before measuring a permeability, 3 ml of media  
 33 was filled in only one side of the well reservoir connected to the side channel, allowing the interstitial flow in  
 34 the low-center channel through gravity-driven flow. Red arrows indicate input medium flow and yellow arrows  
 35 indicate dextran containing out medium which collected in the sampling reservoir. The media flowing out from  
 36 the low-center channel were collected twice at 30 min intervals for 1 h.

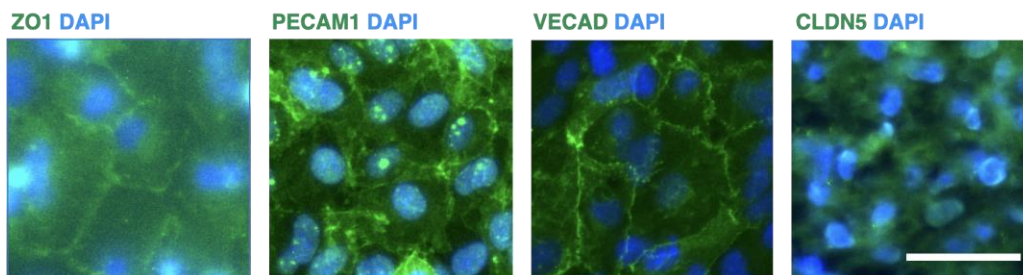

**Figure S5.** Tight junction related protein expression (ZO1, PECAM, VECAD and CLDN5, Green) in hBMECs.

(Scale Bar = 50 μm)

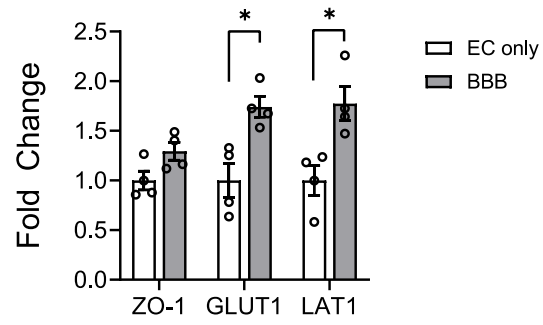

**Figure S6.** ZO-1, GLUT1, and LAT1 gene expression of hBMEC only and BBB (tri-culture) model by qRT-PCR (n =4 for each condition, \*p < 0.05 by student t-test).

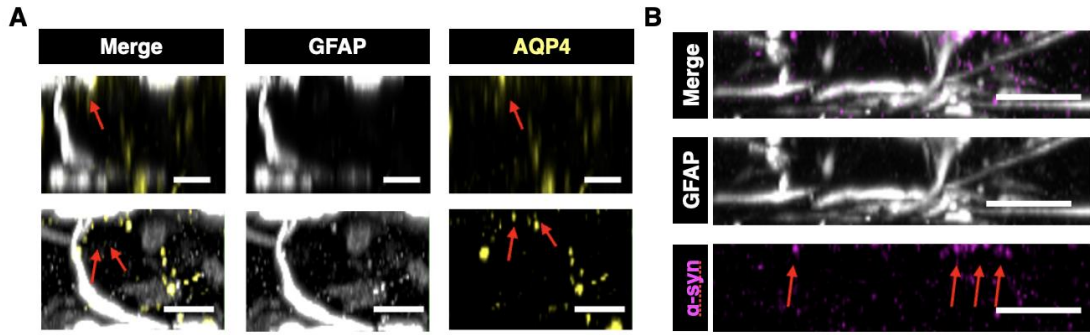

**Figure S7.** Polarization of hAs end feet toward hBMEC layer. (A) Side view of hAs (GFAP, White, and AQP4, Yellow). Red arrows indicate AQP4 expression in the end feet at the interface of hBMECs and hAs (Scale Bar = 20 μm). (B) Side view of hAs (GFAP, White, and α-Syn, Magenta). Red arrows indicate α-Syn expression in the end feet at the interface of hBMECs and hAs (Scale Bar = 20 μm).



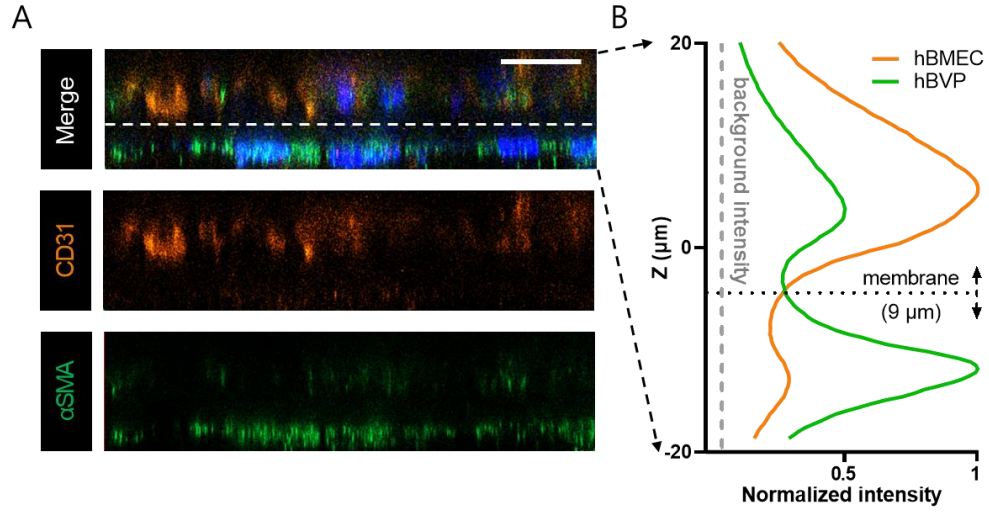

**Figure S8.** Endothelial-pericyte proximity in MEPS-TBC. (A) The side view of immunofluorescence confocal images of hBMEC (CD31, orange) and hBVPs ( $\alpha$ SMA, green) between the porous membrane. (Scale Bar = 20  $\mu$ m) (B) the normalized fluorescence intensity profiles along the z-direction indicate the distribution of hBMEC (CD31, orange) and hBVPs ( $\alpha$ SMA, green) in between the vascular and perivascular channel.

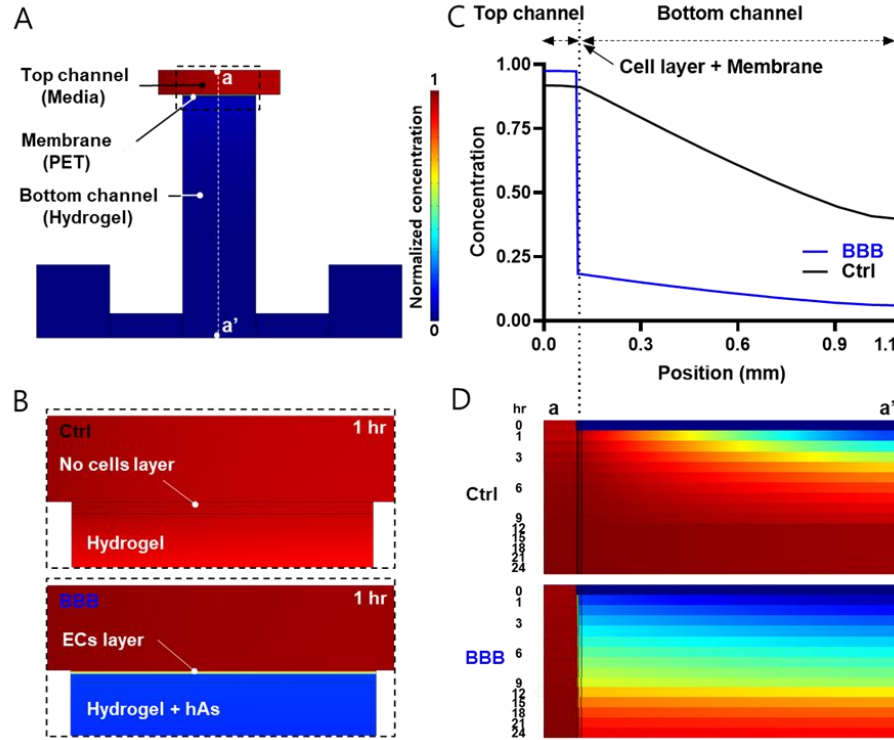

**Figure S9.** Computational simulation of the diffusive transport of 4kDa FITC-dextran in the MEPS-TBC system. (A) The initial concentration distribution of dextran in a 2D cross-sectioned MEPS-TBC and (B) The diffusion gradient of the 4kDa FITC-dextran in black dotted line box in (A) after 1 hour. The BBB case constituted the upper channel (Source of the 4kDa FITC-dextran), ECs layer, porous membrane and hydrogel. The Control (Ctrl) case includes the porous membrane and hydrogel but no ECs layer. (C) Simulated diffusion profiles of cross section a-a' in (A) at 1 hour after the injection of 4kDa FITC-dextran to the upper channel. (D) Simulated gradient changes of the dextran concentration for 24 hours. The dextran concentration was normalized when calculating the diffusion gradient.
